# Supplementary material for: Irreversible colorimetric bio-based curcumin bilayer membranes for smart food packaging temperature control applications
Source: Royal Society of Chemistry journal article supplement (doi:10.1039/d4ra01411a), 2024-01-01
Supplement: d4ra01411a1.pdf [file d4ra01411a1.pdf]

## Supplementary information

### **Irreversible colorimetric bio-based curcumin bilayer membrane for Smart Food Packaging temperature control applications**

Ariane Pereira<sup>a</sup>, Maria A. Marques<sup>b</sup>, Joaquim Alves<sup>b</sup>, Maria Morais<sup>c, f</sup>, Joana Figueira<sup>e, f</sup>, Joana V.  
Pinto<sup>e, f</sup>, Felismina T.C. Moreira<sup>a, c, d\*</sup>

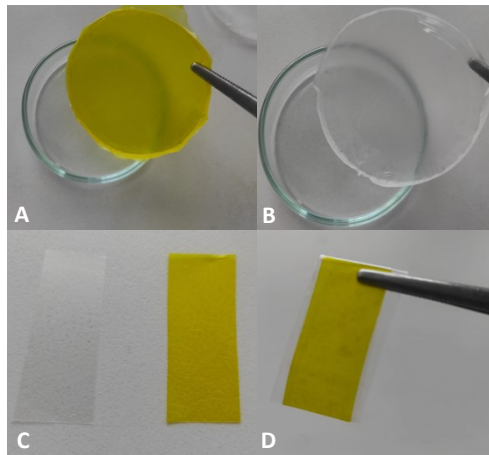

**Figure S1** – Double layer membrane preparation. A) Curcumin MA1; B) TEA MB; c) membrane 1 and membrane 2 Double-layer membrane .

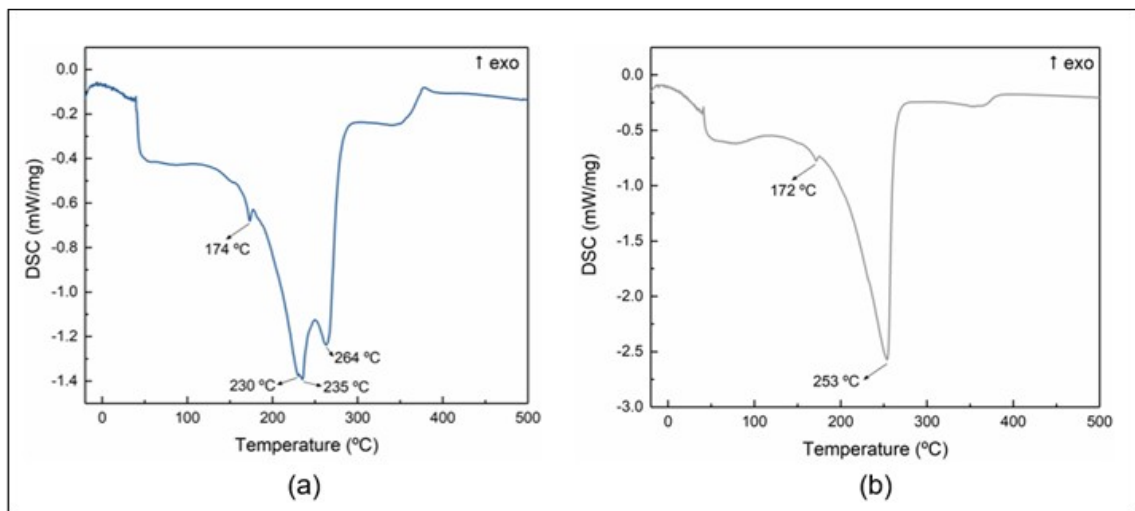

**Figure S2** - (a)DSC curve of the membrane with cellulose acetate and glycerol.(b)DSC curve of the membrane with cellulose acetate and curcumin.

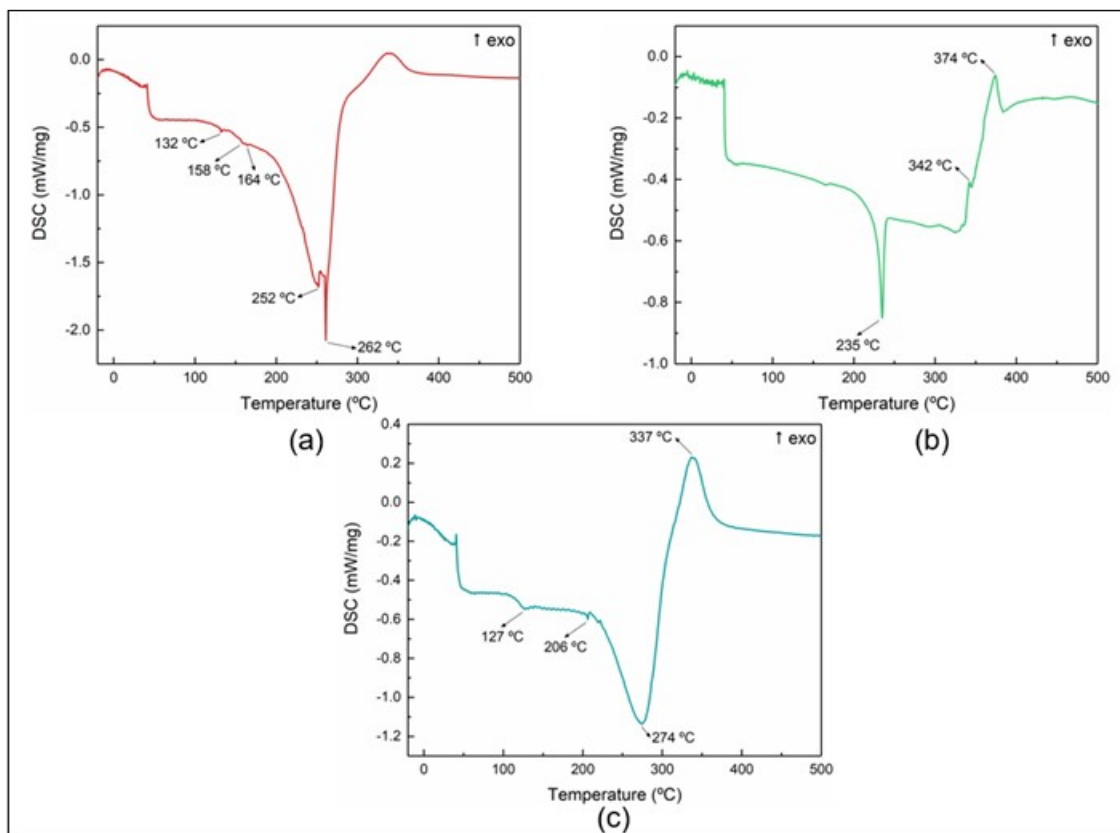

**Figure S3-** (a)DSC curve of the membrane with curcumin after the reaction with triethanolamine.(b)DSC curve of the membrane with cellulose acetate and sorbitol.(c)DSC curve of the membrane with triethanolamine and cellulose acetate.
